# Supplementary material for: Response of Marine Primary Producers to Olivine Additions
Source: Copernicus journal article supplement (doi:10.5194/egusphere-2023-2884), 2024-07-08
Supplement: Supplementary file 1 [file egusphere-2023-2884-supplement.pdf]

# Supplementary material

## S1 – Fluorescence

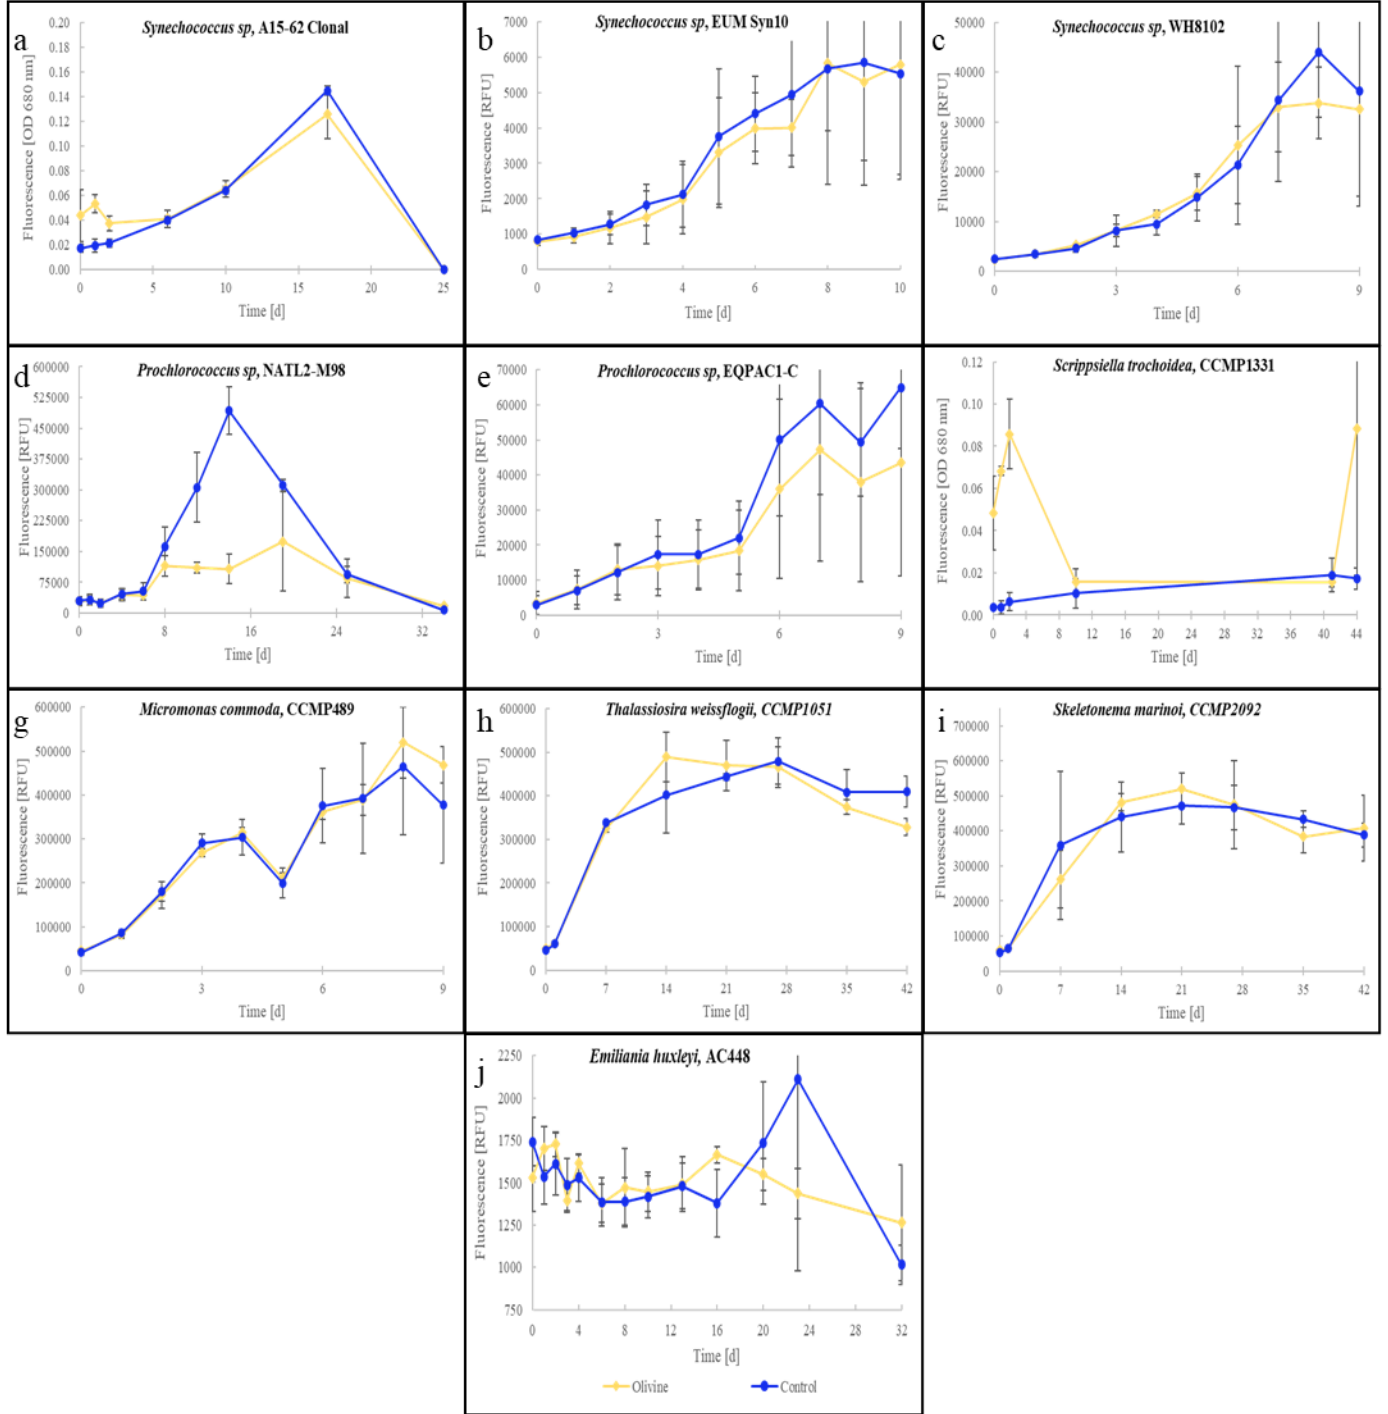

Figure S1. Fluorescence concentrations (RFU or OD 680 nm) in cultures exposed olivine (yellow, diamond) additions, and the control experiments without any olivine supplement (blue, circle). The standard deviation is represented with grey bars.

## S2 – studies within OAE

Table S1. Studies within OAE study olivine or artificial olivine components in different amounts and grain sizes and their effect on TA.

|                                                             |                                                                                  |                                                                                                                           |                                                                                                                              |
|-------------------------------------------------------------|----------------------------------------------------------------------------------|---------------------------------------------------------------------------------------------------------------------------|------------------------------------------------------------------------------------------------------------------------------|
| Batch reactor (geomar)                                      | Ultra-mafic sand,<br>Grain size between 100-125 $\mu\text{m}$                    | 20g, 10g and 5 g added to 200 ml artificial seawater.                                                                     | Fuhr et al. 2022<br>10.3389/fclim.2022.831587                                                                                |
| Natural experiment / beach experiment (New York state, USA) | Olivine,<br>Grain size around 100-300 $\mu\text{m}$                              | mixed 5 % olivine to the sand that is added to the beach zones                                                            | <a href="https://www.nature.com/articles/d41586-023-02032-7">https://www.nature.com/articles/d41586-023-02032-7</a>          |
| Agitation experiment / beach (Antwerpen, Belgium)           | Dunite sand (forsterite, from Norway),<br>Grain size between 1-150 $\mu\text{m}$ | Approx. 150 g dunite sand mixed with 700 mL seawater. To generate a sand layer and a layer with water on top of the sand. | Flipkens et al. 2023<br><a href="https://doi.org/10.1016/j.gca.2023.09.002">https://doi.org/10.1016/j.gca.2023.09.002</a>    |
| Phytoplankton exposure experiment                           | Mg(OH) <sub>2</sub>                                                              |                                                                                                                           | Delacroix et al. 2023<br><a href="https://doi.org/10.5194/bg-2023-138">https://doi.org/10.5194/bg-2023-138</a> , 2023        |
| Phytoplankton growth experiment                             | Synthetic olivine leachate                                                       |                                                                                                                           | Hutchins et al. 2023<br><a href="https://doi.org/10.5194/bg-20-4669-2023">https://doi.org/10.5194/bg-20-4669-2023</a> , 2023 |
